# Supplementary material for: A Reduced Starch Level in Plants at Early Stages of Infection by Viruses Can Be Considered a Broad-Range Indicator of Virus Presence
Source: MDPI journal article supplement (doi:10.3390/v14061176), 2022-05-28
Supplement: s1 [file s1]

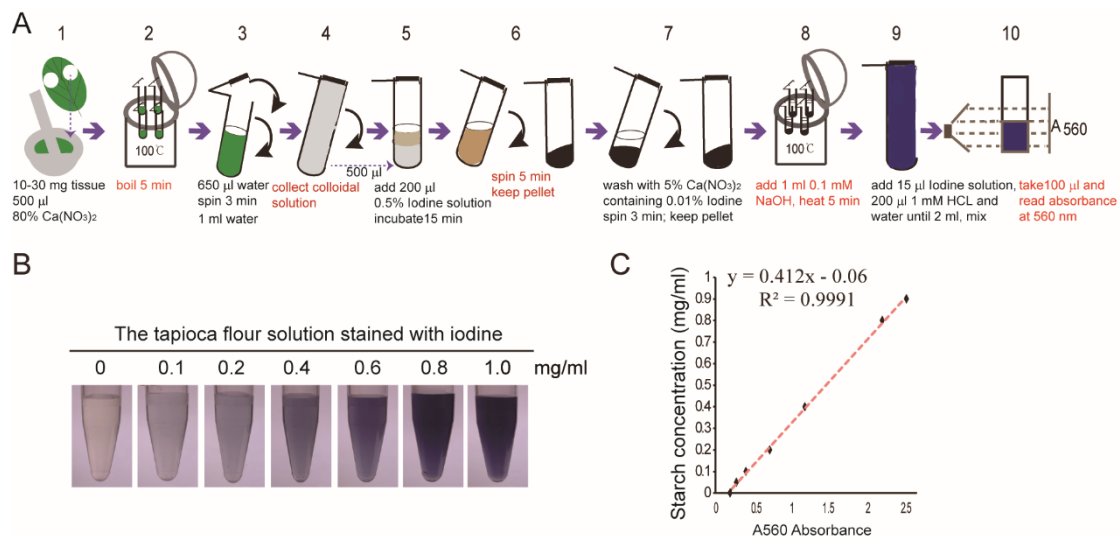

**Figure S1.** Purification and determination of starch content in leaves. **(A)** A schematic diagram detailing the procedure for the quantification of starch content in leaves. **(B)** The series of concentration of tapioca flour solutions (0, 0.1, 0.2, 0.4, 0.6, 0.8, 1.0 mg/ml water) were stained with iodine described in (A). **(C)** Calibration graph of absorbance at 560 nm against concentration (mg/ml) of tapioca flour solutions described in (B), the linear regression equation  $Y$  (starch concentration, mg/ml) =  $0.412X$  (absorbance) – 0.06 (correlation coefficient,  $R^2 = 0.9991$ ).

Table S1. Primers were used in this study.

| Primer Name       | Oligonucleotide sequence (5' - 3') | GenBank Accession Number | Size of PCR product |
|-------------------|------------------------------------|--------------------------|---------------------|
| F-CMV-RNA3        | TCCCTTGCCGAAATTCGATTCTAC           | MG025949                 |                     |
| R-CMV-RNA3        | CGTACCCTGAACTAGCACGTTG             | MG025949                 | 589 bp              |
| F-TMV             | TGCTGCATGCCCAACCTGGACGTTT          | AF165190                 |                     |
| R-TMV             | AGACTTCCTTGCGGTCCTCTTACT           | AF165190                 | 805 bp              |
| F-PVX             | ATTGCCGATCTCAAGCCACT               | NC_011620.1              |                     |
| R-PVX             | GGGGTAGGCGTCGTTAT                  | NC_011620.1              | 800 bp              |
| F-PVY-CP          | ATGCAAGCAAATGACACAATCGATG          | JF927760.1               |                     |
| R-PVY-CP          | TCACATGTTCTTAAGTCCAAGTAG           | JF927760.1               | 810 bp              |
| F-AGV             | CCTTCTGGACAAGAGCAA                 | KM386645                 |                     |
| R-AGV             | AGATGATTGGGTGAGTGT                 | KM386645                 | 496 bp              |
| F-ASGV-CP         | CCCGCTGTTGGATTGATACACCTC           | NC_001749.2              |                     |
| R-ASGV-CP         | CTGCAAGACCGCGACCAAGTTT             | NC_001749.2              | 524 bp              |
| F-ASPV-CP         | ATGTCTGGAACCTCATGCTGCAA            | NC_003462.2              |                     |
| R-ASPV-CP         | TTGGGATCAACTTTACTAAAAAGCATAA       | NC_003462.2              | 363 bp              |
| F-ACLSV-CP        | TCTGCAAGAGAATTTTCAGTT              | KC935956.1               |                     |
| R-ACLSV-CP        | GTCTACAGGCTATTTATTATAAG            | KC935956.1               | 824 bp              |
| F-Nb18S           | GCAAGACCGAAACTCAAAGG               | TC23401                  |                     |
| R-Nb18S           | TGTTTCATATGTCAAGGGCTGG             | TC23401                  | 150 bp              |
| F-MdEF-1 $\alpha$ | ATTCAAGTATGCCTGGGTGC               | NC_041799                |                     |
| R-MdEF-1 $\alpha$ | CAGTCAGCCTGTGATGTTCC               | NC_041799                | 174 bp              |
| F-NbAGPase L1-RT  | TGCTACAGGCTAATAGACATCCC            | NbS00018336g0015.1       |                     |
| R-NbAGPase L1-RT  | ACCTCAACAAATCCGTCTCCAAA            | NbS00018336g0015.1       | 158 bp              |
| F-NbAGPase L2-RT  | CCGTTCTACACTTCTCCT                 | NbS00011082g0009.1       |                     |
| R-NbAGPase L2-RT  | ATAGTCCGCACCCATCAT                 | NbS00011082g0009.1       | 186 bp              |
| F-NbAGPase L3-RT  | ATGATGCTTGGTGCTGACTACTATG          | NbS00050736g0008.1       |                     |
| R-NbAGPase L3-RT  | TCTGCTTCTGTACGCCCTCTG              | NbS00050736g0008.1       | 179 bp              |
| F-NbAGPase S-RT   | CCACACACTCCATAGCAGA                | Niben101Scf01625         |                     |
| R-NbAGPase S-RT   | AGAGATGAGACGACGAAAA                | Niben101Scf01625         | 174 bp              |
| F-NbGBSS-RT       | CACAATGGGTTGAGGGC                  | Niben101Scf08819         |                     |
| R-NbGBSS-RT       | CAGGGCTGGTGGTAGTC                  | Niben101Scf08819         | 231 bp              |
| F-NbGWD-RT        | GATGAAGGTCCAAAGCG                  | Nbv6.1trP17673           |                     |
| R-NbGWD-RT        | GACAGCCATGCACAGAT                  | Nbv6.1trP17673           | 132 bp              |
